# Supplementary material for: Evaluation of Resistance to Stem Rust and Identification of Sr Genes in Russian Spring and Winter Wheat Cultivars in the Volga Region
Source: MDPI journal article supplement (doi:10.3390/agriculture13030635), 2023-03-07
Supplement: s1 [file s1]

**Table S1.** Durum wheat cultivars used in the study.

| Wheat cultivar             | Originators of cultivars                                                                                                                                                                                                                                  |
|----------------------------|-----------------------------------------------------------------------------------------------------------------------------------------------------------------------------------------------------------------------------------------------------------|
| Bezenchukskaya 182         | Samara Federal Research Scientific Center Of The Russian Academy Of Sciences                                                                                                                                                                              |
| Bezenchukskaya 205         |                                                                                                                                                                                                                                                           |
| Bezenchukskaya 209         |                                                                                                                                                                                                                                                           |
| Bezenchukskaya 210         |                                                                                                                                                                                                                                                           |
| Bezenchukskaya niva        |                                                                                                                                                                                                                                                           |
| Bezenchukskaya stepnaya    |                                                                                                                                                                                                                                                           |
| Bezenchukskaya yubilejnaya |                                                                                                                                                                                                                                                           |
| Bezenchukskaya zolotistaya |                                                                                                                                                                                                                                                           |
| Bezenchukskaya krepot'     |                                                                                                                                                                                                                                                           |
| Marina                     | Samara Federal Research Scientific Center Of The Russian Academy Of Sciences,<br>Federal Research Scientific Center Of Legumes And Groat CropS,<br>Federal State Budget Scientific Organization "National Center Of Grain Named After<br>P.P. Lukyanenko" |
| Triada                     |                                                                                                                                                                                                                                                           |
| Annushka                   | Federal Center Of Agriculture Research Of The South-East Region                                                                                                                                                                                           |
| Elizavetinskaya            |                                                                                                                                                                                                                                                           |
| Krasnokutka 10             |                                                                                                                                                                                                                                                           |
| Krasnokutka 13             |                                                                                                                                                                                                                                                           |
| Luch 25                    |                                                                                                                                                                                                                                                           |
| Lyudmila                   |                                                                                                                                                                                                                                                           |
| Nik                        | Federal Center Of Agriculture Research Of The South-East Region,<br>Federal State Budget Scientific Organization "National Center Of Grain Named After<br>P.P. Lukyanenko"                                                                                |
| Nikolasha                  |                                                                                                                                                                                                                                                           |
| Pamyati Vasil'chuka        | Federal center of agriculture research of the south-east region                                                                                                                                                                                           |
| Saratovskaya zolotistaya   |                                                                                                                                                                                                                                                           |
| Valentina                  | Fsbh 'Caspian Agricultural Federal Scientific Center Of The Russian Academy Of<br>Sciences',<br>Federal State Budget Scientific Organization "National Center Of Grain Named After<br>P.P. Lukyanenko"                                                    |
| Kermen                     |                                                                                                                                                                                                                                                           |

**Table S2.** Spring bread wheat cultivars used in the study.

| Wheat cultivar            | Originators of cultivars                                                                                                                                                                                                                                                                                                                                                |
|---------------------------|-------------------------------------------------------------------------------------------------------------------------------------------------------------------------------------------------------------------------------------------------------------------------------------------------------------------------------------------------------------------------|
| Burlak                    | Samara Federal Research Scientific Center Of The Russian Academy Of Sciences                                                                                                                                                                                                                                                                                            |
| Ekada 109                 | Samara Federal Research Scientific Center Of The Russian Academy Of Sciences,<br>Federal Research Center «Kazan Scientific Center Of Russian Academy Of Sciences»,<br>Ufa Federal Research Centre Of The Russian Academy Of Sciences,<br>Federal Research Center For Bast Fiber Crops,<br>Company 'Fiton Duet'                                                          |
| Ekada 113                 | Samara Federal Research Scientific Center Of The Russian Academy Of Sciences, Federal Research Center<br>«Kazan Scientific Center Of Russian Academy Of Sciences»,<br>Ufa Federal Research Centre Of The Russian Academy Of Sciences,<br>Federal Research Center For Bast Fiber Crops,<br>Llp Np Company 'Fiton' (Kazakhstan), Aktobe Agricultural Experimental Station |
| Ekada 214                 | Samara Federal Research Scientific Center Of The Russian Academy Of Sciences,<br>Federal Research Center «Kazan Scientific Center Of Russian Academy Of Sciences»,<br>Ufa Federal Research Centre Of The Russian Academy Of Sciences,<br>Federal Research Center For Bast Fiber Crops,<br>LLP NP Company 'Fiton'(Kazakhstan)                                            |
| Ekada 253                 | Samara Federal Research Scientific Center Of The Russian Academy Of Sciences, Federal Research Center<br>«Kazan Scientific Center Of Russian Academy Of Sciences»,                                                                                                                                                                                                      |
| Ekada 258                 | Ufa Federal Research Centre Of The Russian Academy Of Sciences,<br>Federal Research Center For Bast Fiber Crops                                                                                                                                                                                                                                                         |
| Kinel'skaya 2010          | Samara Federal Research Scientific Center Of The Russian Academy Of Sciences                                                                                                                                                                                                                                                                                            |
| Kinel'skaya 59            |                                                                                                                                                                                                                                                                                                                                                                         |
| Kinel'skaya niva          |                                                                                                                                                                                                                                                                                                                                                                         |
| Kinel'skaya yubilejnaya   |                                                                                                                                                                                                                                                                                                                                                                         |
| Margarita                 |                                                                                                                                                                                                                                                                                                                                                                         |
| Nikon                     |                                                                                                                                                                                                                                                                                                                                                                         |
| Tulaikovskaya 5           |                                                                                                                                                                                                                                                                                                                                                                         |
| Tulaikovskaya 10          |                                                                                                                                                                                                                                                                                                                                                                         |
| Tulaikovskaya 100         |                                                                                                                                                                                                                                                                                                                                                                         |
| Tulaikovskaya 108         |                                                                                                                                                                                                                                                                                                                                                                         |
| Tulaikovskaya 110         |                                                                                                                                                                                                                                                                                                                                                                         |
| Tulaikovskaya nadezhda    |                                                                                                                                                                                                                                                                                                                                                                         |
| Tulaikovskaya zolotistaya |                                                                                                                                                                                                                                                                                                                                                                         |
| Ul'yanovskaya 100         |                                                                                                                                                                                                                                                                                                                                                                         |
| Ul'yanovskaya 105         |                                                                                                                                                                                                                                                                                                                                                                         |
| Zhigulevkaya              |                                                                                                                                                                                                                                                                                                                                                                         |
| Al'bidum 32               | Federal Center Of Agriculture Research Of The South-East Region                                                                                                                                                                                                                                                                                                         |
| Al'bidum 33               |                                                                                                                                                                                                                                                                                                                                                                         |
| Aleksandrit               |                                                                                                                                                                                                                                                                                                                                                                         |
| Belyanka                  |                                                                                                                                                                                                                                                                                                                                                                         |
| Dobrynya                  |                                                                                                                                                                                                                                                                                                                                                                         |
| Ershovskaya 36            |                                                                                                                                                                                                                                                                                                                                                                         |
| Favorit                   |                                                                                                                                                                                                                                                                                                                                                                         |
| Kur'er                    |                                                                                                                                                                                                                                                                                                                                                                         |
| Kvartet L 375             |                                                                                                                                                                                                                                                                                                                                                                         |
| L 503                     |                                                                                                                                                                                                                                                                                                                                                                         |
| L 505                     |                                                                                                                                                                                                                                                                                                                                                                         |
| Lebedushka                | Federal Center Of Agriculture Research Of The South-East Region                                                                                                                                                                                                                                                                                                         |
| Prohorovka                |                                                                                                                                                                                                                                                                                                                                                                         |
| Saratovskaya 55           |                                                                                                                                                                                                                                                                                                                                                                         |
| Saratovskaya 58           |                                                                                                                                                                                                                                                                                                                                                                         |
| Saratovskaya 68           |                                                                                                                                                                                                                                                                                                                                                                         |
| Saratovskaya 70           |                                                                                                                                                                                                                                                                                                                                                                         |
| Saratovskaya 73           |                                                                                                                                                                                                                                                                                                                                                                         |
| Saratovskaya 74           |                                                                                                                                                                                                                                                                                                                                                                         |
| Saratovskaya 76           |                                                                                                                                                                                                                                                                                                                                                                         |
| Voevoda                   |                                                                                                                                                                                                                                                                                                                                                                         |
| Yugo-Vostochnaya 2        |                                                                                                                                                                                                                                                                                                                                                                         |

|                        |                                                                                                                                                                                                                                                                                                                                                    |
|------------------------|----------------------------------------------------------------------------------------------------------------------------------------------------------------------------------------------------------------------------------------------------------------------------------------------------------------------------------------------------|
| Yugo-Vostochnaya 4     |                                                                                                                                                                                                                                                                                                                                                    |
| 100 let TASSR          |                                                                                                                                                                                                                                                                                                                                                    |
| Al' Varis              |                                                                                                                                                                                                                                                                                                                                                    |
| Amir                   |                                                                                                                                                                                                                                                                                                                                                    |
| Balkysh                | Federal Research Center «Kazan Scientific Center Of Russian Academy Of Sciences»                                                                                                                                                                                                                                                                   |
| Barakat                |                                                                                                                                                                                                                                                                                                                                                    |
| Bulyak                 |                                                                                                                                                                                                                                                                                                                                                    |
| Chistopol'skaya        |                                                                                                                                                                                                                                                                                                                                                    |
| Ekada 265              | Samara Federal Research Scientific Center Of The Russian Academy Of Sciences,<br>Federal Research Center «Kazan Scientific Center Of Russian Academy Of Sciences»,<br>Ufa Federal Research Centre Of The Russian Academy Of Sciences,<br>Federal Research Center For Bast Fiber Crops,<br>LLP NP Company 'Fiton' (Kazakhstan),<br>Ltd Kurgansemena |
| KHayat                 | Federal Research Center «Kazan Scientific Center Of Russian Academy Of Sciences»,<br>Ltd Kurgansemena                                                                                                                                                                                                                                              |
| KHazine                |                                                                                                                                                                                                                                                                                                                                                    |
| Idelle                 |                                                                                                                                                                                                                                                                                                                                                    |
| Joldyz                 |                                                                                                                                                                                                                                                                                                                                                    |
| Kazanskaya Yubilejnaya | Federal Research Center «Kazan Scientific Center Of Russian Academy Of Sciences»                                                                                                                                                                                                                                                                   |
| Nadira                 |                                                                                                                                                                                                                                                                                                                                                    |
| Sakara                 |                                                                                                                                                                                                                                                                                                                                                    |
| Sitara                 |                                                                                                                                                                                                                                                                                                                                                    |

**Table S3.** Winter bread wheat cultivars used in the study.

| Wheat cultivar     | Originators of cultivars                                                                                                                                                                         |
|--------------------|--------------------------------------------------------------------------------------------------------------------------------------------------------------------------------------------------|
| Al'ternativa       | Samara Federal Research Scientific Center Of The Russian Academy Of Sciences                                                                                                                     |
| Bazis              |                                                                                                                                                                                                  |
| Bezenchukskaya 380 |                                                                                                                                                                                                  |
| Biryuza            | Samara Federal Research Scientific Center Of The Russian Academy Of Sciences,<br>Federal State Budget Scientific Organization "National Center Of Grain Named After P.P. Lukyanenko"             |
| Estafeta           |                                                                                                                                                                                                  |
| Integratsiya       | Samara Federal Research Scientific Center Of The Russian Academy Of Sciences,<br>Federal State Budget Scientific Institution "Agrarian Research Center "Donskoy"                                 |
| Kinel'skaya 4      | Samara Federal Research Scientific Center Of The Russian Academy Of Sciences                                                                                                                     |
| Malahit            |                                                                                                                                                                                                  |
| Povolzhskaya 86    |                                                                                                                                                                                                  |
| Povolzhskaya niva  |                                                                                                                                                                                                  |
| Resurs             |                                                                                                                                                                                                  |
| Skirda             |                                                                                                                                                                                                  |
| Svetoch            |                                                                                                                                                                                                  |
| Vertikal'          | Samara Federal Research Scientific Center Of The Russian Academy Of Sciences,<br>Federal State Budget Scientific Institution "Agrarian Research Center "Donskoy"                                 |
| V'yuga             | Samara Federal Research Scientific Center Of The Russian Academy Of Sciences                                                                                                                     |
| Aelita             | Federal Center Of Agriculture Research Of The South-East Region                                                                                                                                  |
| Dzhangal'          |                                                                                                                                                                                                  |
| Levoberezhnaya 1   |                                                                                                                                                                                                  |
| Levoberezhnaya 3   |                                                                                                                                                                                                  |
| Novoershovskaya    | Federal State Budget Scientific Organization "National Center Of Grain Named After P.P. Lukyanenko"                                                                                              |
| Antonina           |                                                                                                                                                                                                  |
| Bair               | Fsbi 'Caspian Agricultural Federal Scientific Center Of The Russian Academy Of Sciences',<br>Federal State Budget Scientific Organization "National Center Of Grain Named After P.P. Lukyanenko" |
| Bezostaya 100      | Federal State Budget Scientific Organization "National Center Of Grain Named After P.P. Lukyanenko",<br>Llc Npo 'Kubanzerno'                                                                     |
| Brigada            |                                                                                                                                                                                                  |
| Bulgun             | Fsbi 'Caspian Agricultural Federal Scientific Center Of The Russian Academy Of Sciences',<br>Federal State Budget Scientific Organization "National Center Of Grain Named After P.P. Lukyanenko" |
| Chernozemka 115    | Fsbsi 'Voronezh Federal Agricultural Scientific Center Named After. V.V.Dokuchaev',<br>Federal State Budget Scientific Organization "National Center Of Grain Named After P.P. Lukyanenko"       |
| Dolya              | Federal State Budget Scientific Organization "National Center Of Grain Named After P.P. Lukyanenko"                                                                                              |
| Elanchik           |                                                                                                                                                                                                  |
| Esaul              |                                                                                                                                                                                                  |
| Gerda              |                                                                                                                                                                                                  |
| Graf               |                                                                                                                                                                                                  |
| Grom               |                                                                                                                                                                                                  |
| Gurt               |                                                                                                                                                                                                  |
| Hasyr              | Fsbi 'Caspian Agricultural Federal Scientific Center Of The Russian Academy Of Sciences',<br>Federal State Budget Scientific Organization "National Center Of Grain Named After P.P. Lukyanenko" |
| Laureat            | Federal State Budget Scientific Organization "National Center Of Grain Named After P.P. Lukyanenko"                                                                                              |
| Liga 1             |                                                                                                                                                                                                  |
| Proton             |                                                                                                                                                                                                  |
| Soberbash          |                                                                                                                                                                                                  |
| Svarog             | Federal State Budget Scientific Organization "National Center Of Grain Named After P.P. Lukyanenko",<br>Llc Npo 'Kubanzerno'                                                                     |
| Timiryazevka 150   | Federal State Budget Scientific Organization "National Center Of Grain Named After P.P. Lukyanenko"                                                                                              |
| Vekha              | Federal State Budget Scientific Organization "National Center Of Grain Named After P.P. Lukyanenko",<br>Llc Npo 'Kubanzerno'                                                                     |
| Yashkulyanka       | Fsbi 'Caspian Agricultural Federal Scientific Center Of The Russian Academy Of Sciences',<br>Federal State Budget Scientific Organization "National Center Of Grain Named After P.P. Lukyanenko" |

**Table S4.** Sources of resistance genes used in the study.

| <b><i>Sr</i> gene</b> | <b>Wheat lines / Cultivars</b> |
|-----------------------|--------------------------------|
| <i>Sr2compl</i>       | Pavon76                        |
| <i>Sr8b</i>           | Barleta Benvenuto              |
| <i>Sr12</i>           | CS-TC3B-SR12                   |
| <i>Sr13</i>           | St464Sr13                      |
| <i>Sr15</i>           | W2691'2/NORKA-SR15             |
| <i>Sr20</i>           | LC-SR20-MQ                     |
| <i>Sr22</i>           | SWSR22T.B.                     |
| <i>Sr24</i>           | BTSR24AG, Payne                |
| <i>Sr25</i>           | LC-SR25-ARS, Omskaya 37        |
| <i>Sr26</i>           | Sr26/9*LMPG, Eagle             |
| <i>Sr27</i>           | COORONG TRITICALE              |
| <i>Sr28</i>           | W2691/SR28KT                   |
| <i>Sr29</i>           | PUSA/EDCH-SR29                 |
| <i>Sr31</i>           | Avrora, Kavkaz                 |
| <i>Sr32</i>           | C77.19.Sr32                    |
| <i>Sr33</i>           | RL5405                         |
| <i>Sr35</i>           | W3763-SR35                     |
| <i>Sr36</i>           | Cook, Sr36/8*LMPG              |
| <i>Sr37</i>           | W2691Sr37TT2, W3563            |
| <i>Sr39</i>           | RL6082                         |
| <i>Sr40</i>           | RL6088                         |
| <i>Sr44</i>           | Taf-2                          |
| <i>SrWLD</i>          | BTSR WLD                       |
| <i>Sr7a+12</i>        | Cris                           |
| <i>Sr17+13</i>        | Combination VII                |
| <i>Sr7b+18</i>        | MQ-SR7B,Sr18                   |
| <i>Sr26+9g</i>        | EAGLE-SR26.SR9G                |
| <i>Sr33+5</i>         | T./AE.SQ-SR33.SR5              |
